# Supplementary material for: Glia of C. elegans coordinate a protective organismal heat shock response independent of the neuronal thermosensory circuit
Source: PubMed Central journal article supplement (PMC9733925; doi:10.1126/sciadv.abq3970), 2022-12-09
Supplement: sciadv.abq3970_sm.pdf [file sciadv.abq3970_sm.pdf]

Supplementary Materials for

**Glia of *C. elegans* coordinate a protective organismal heat shock response independent of the neuronal thermosensory circuit**

Holly K. Gildea *et al.*

Corresponding author: Andrew Dillin, [dillin@berkeley.edu](mailto:dillin@berkeley.edu)

*Sci. Adv.* **8**, eabq3970 (2022)  
DOI: 10.1126/sciadv.abq3970

**This PDF file includes:**

Figs. S1 to S5

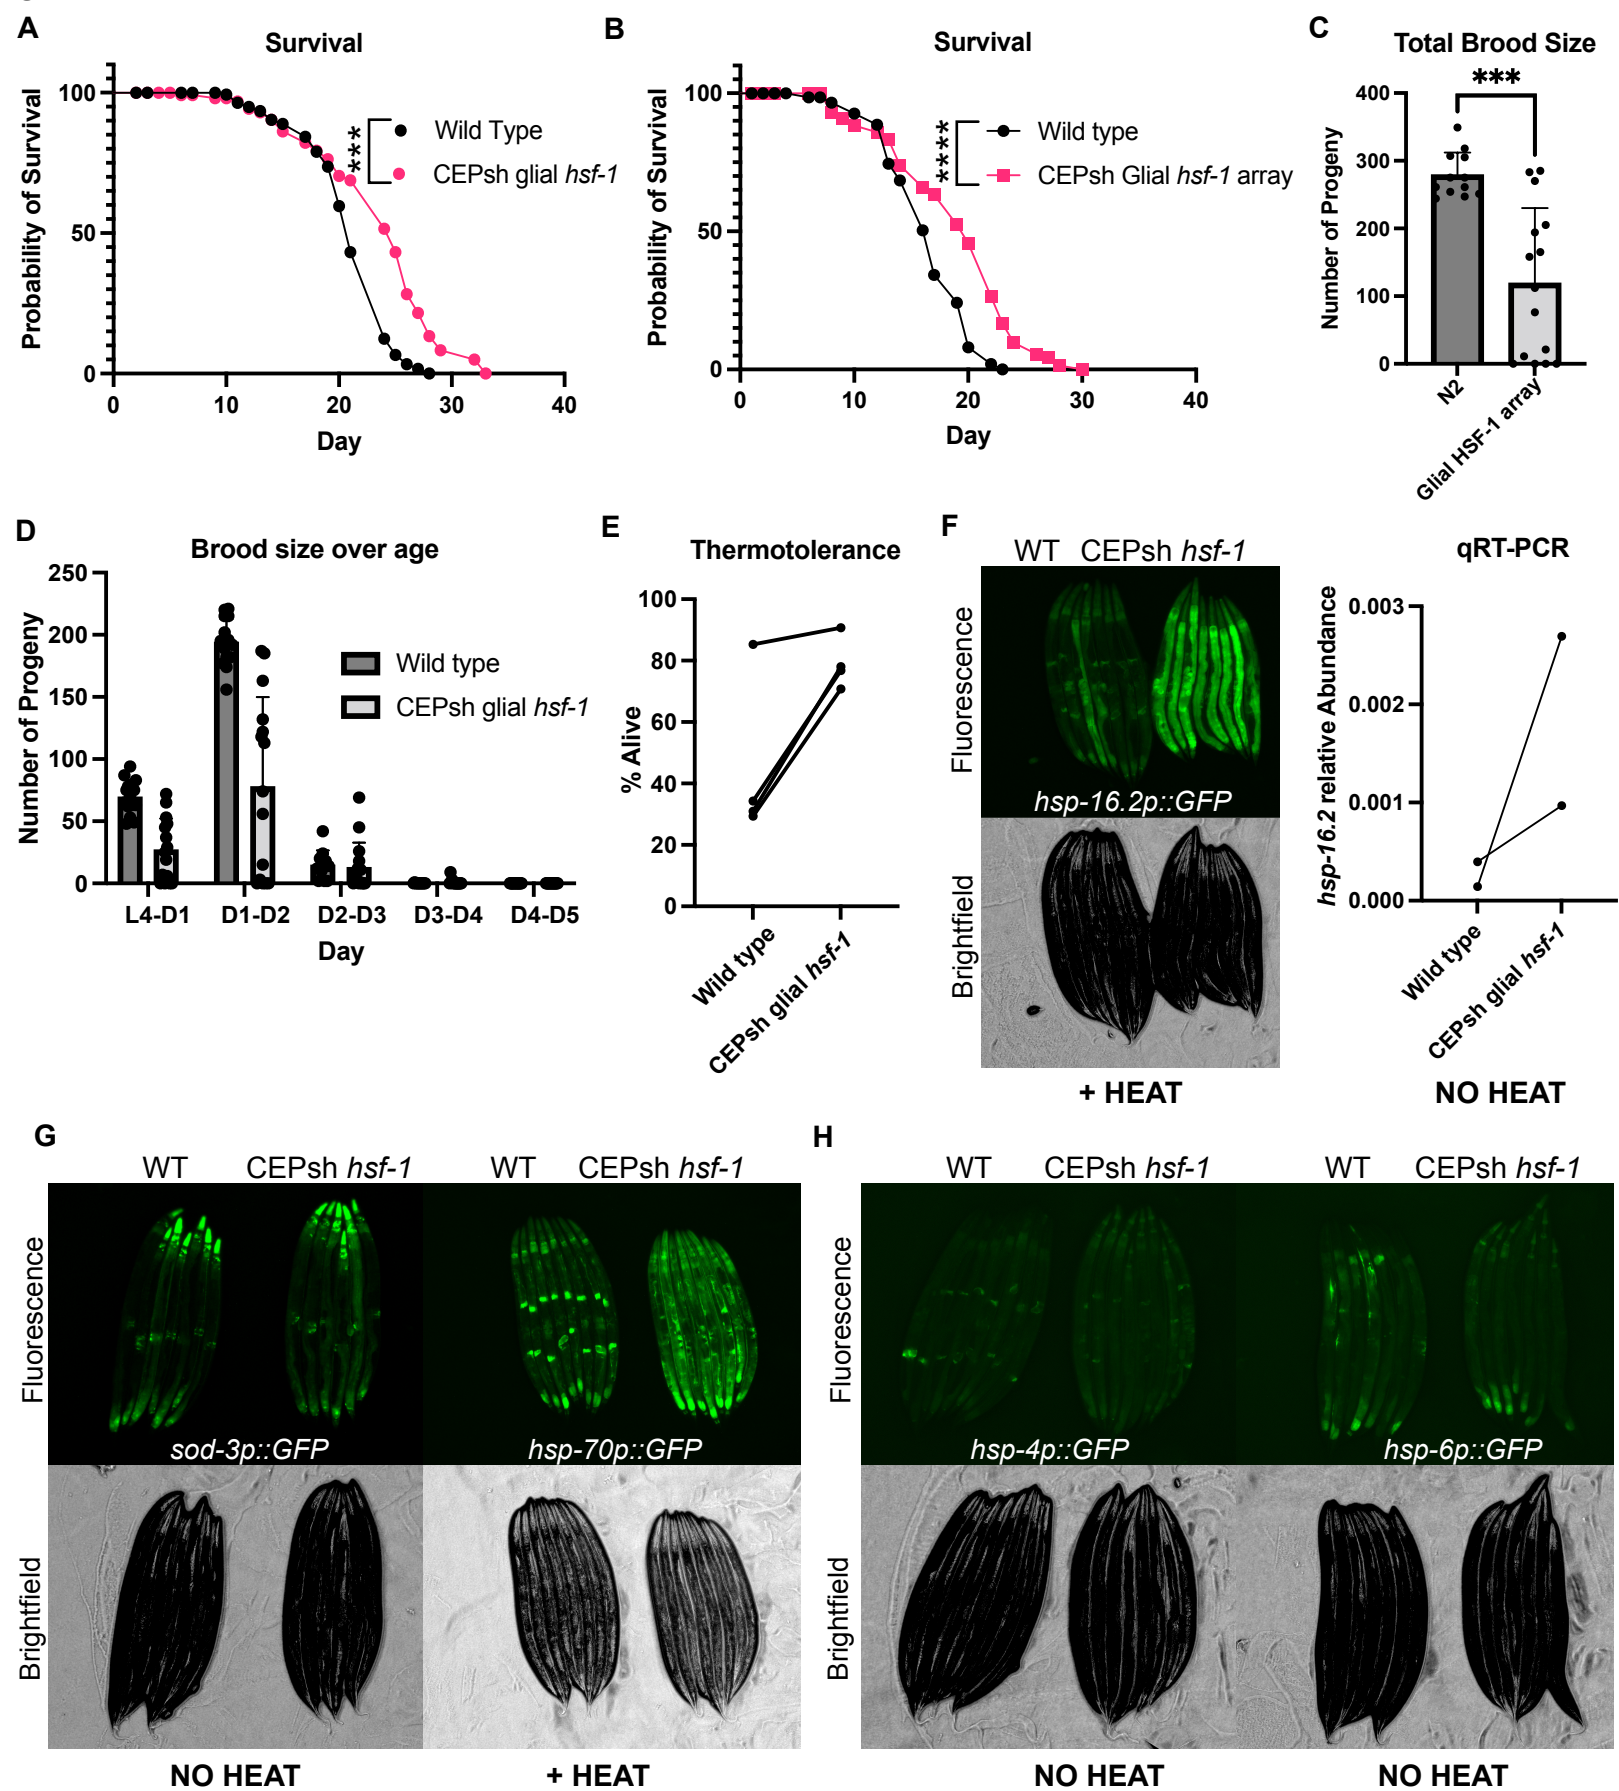



**S2****A**

Wild type

CEPsh glial *hsf-1**hh-17p::GFP*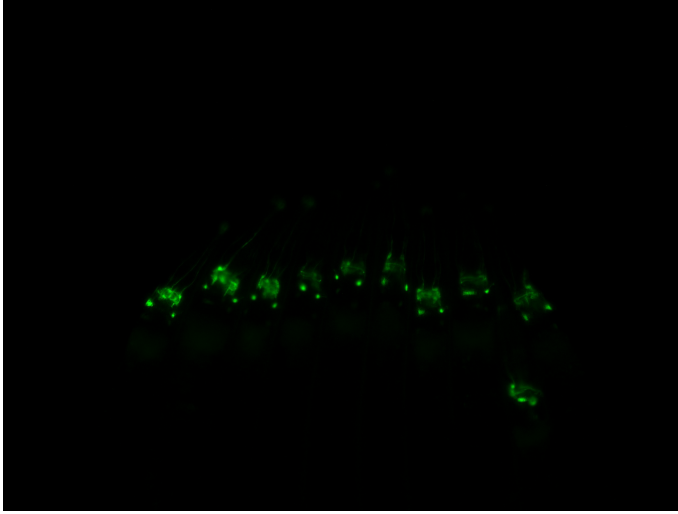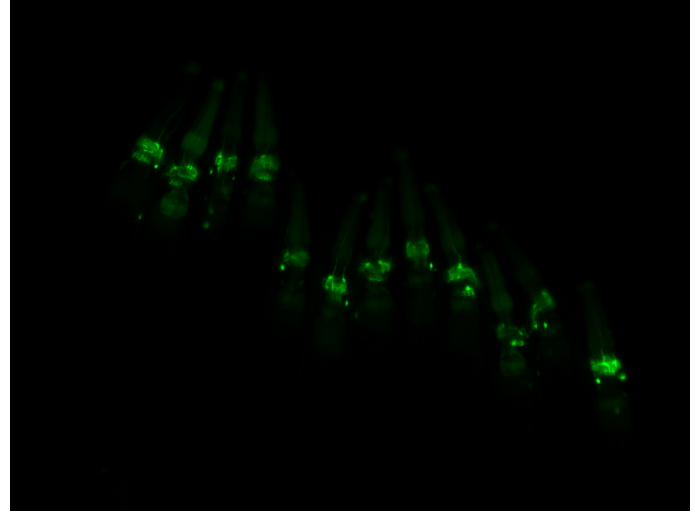**B**

Wild type

CEPsh glial *hsf-1*

DIO

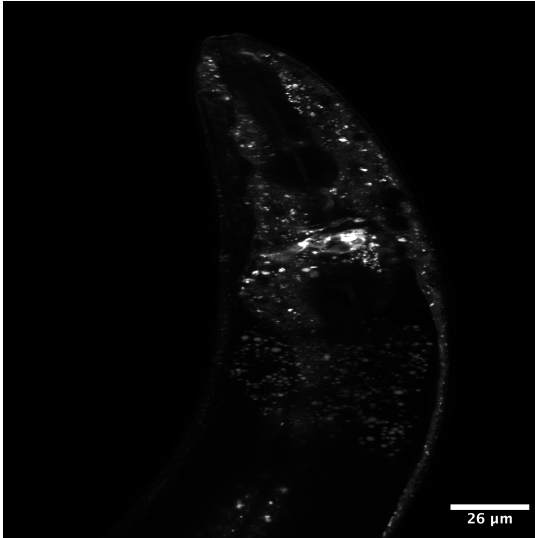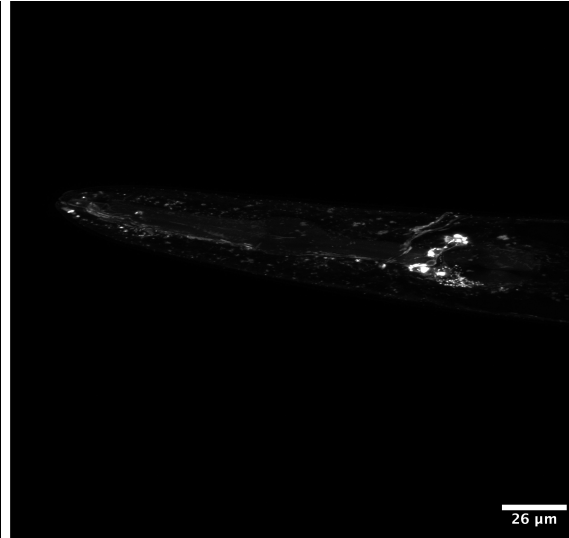**C**Wild type *fig-1p::hsf-1***D**Wild type *mir-228p::hsf-1***E**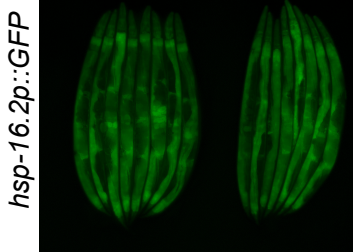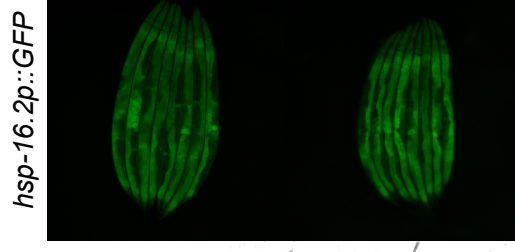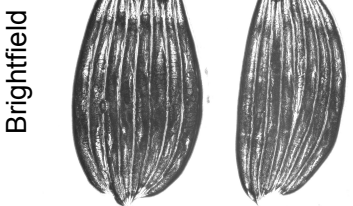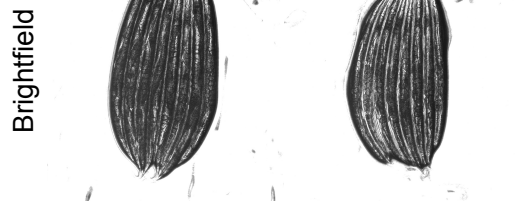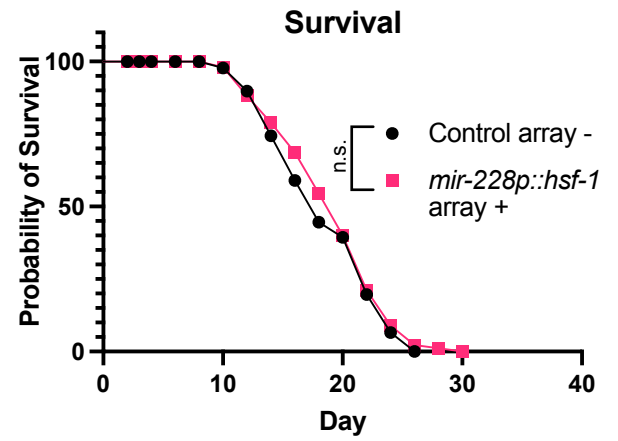

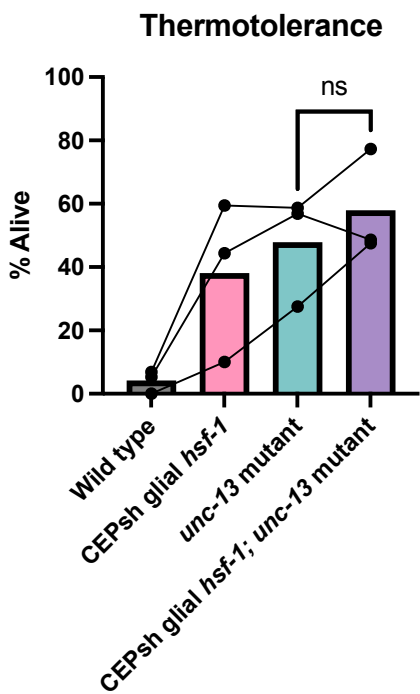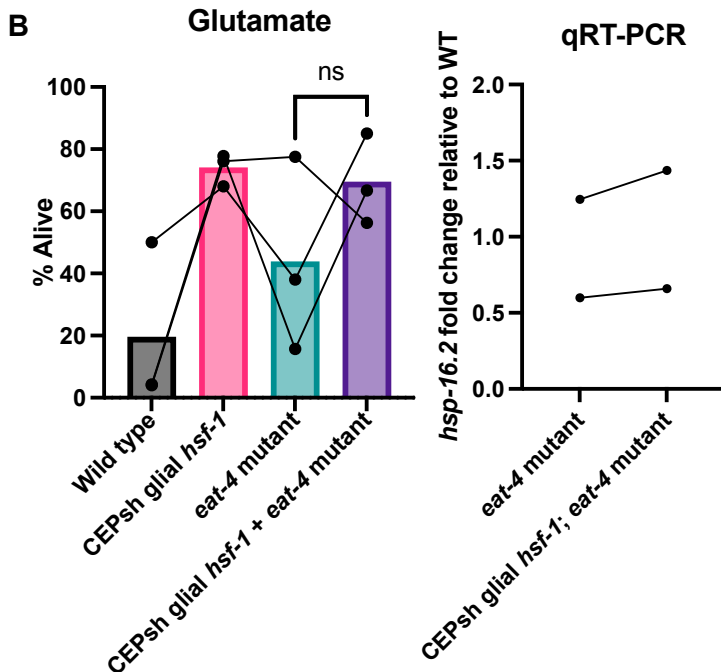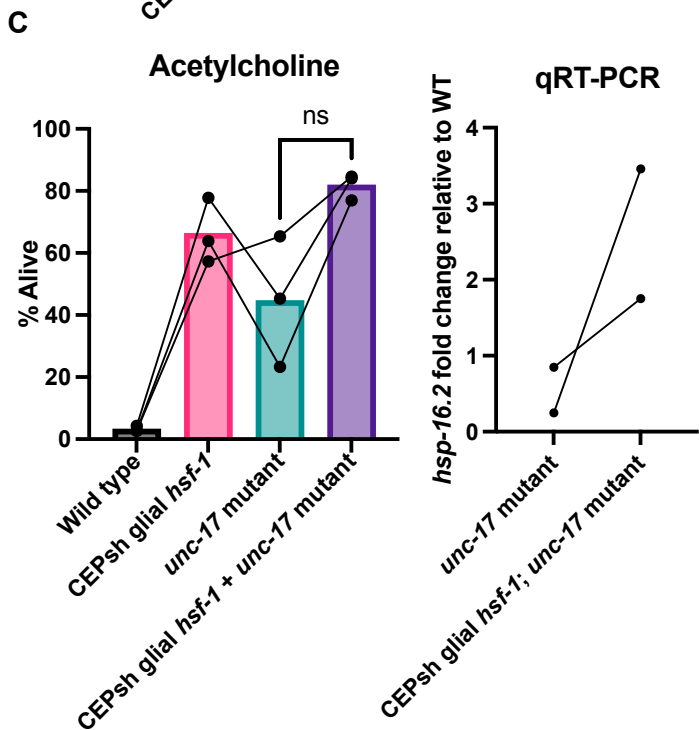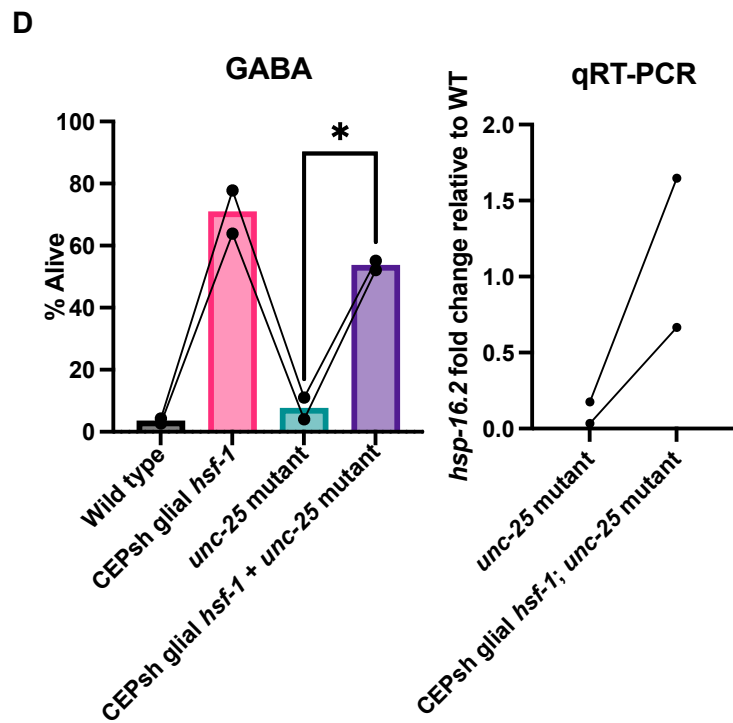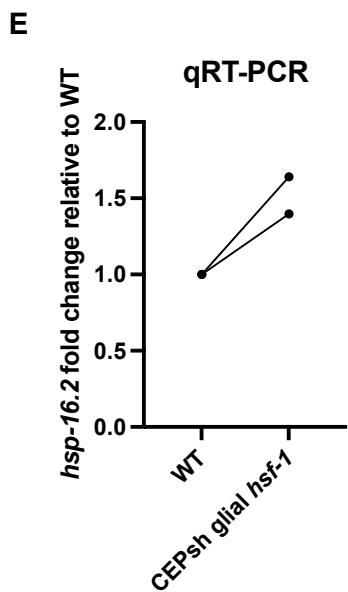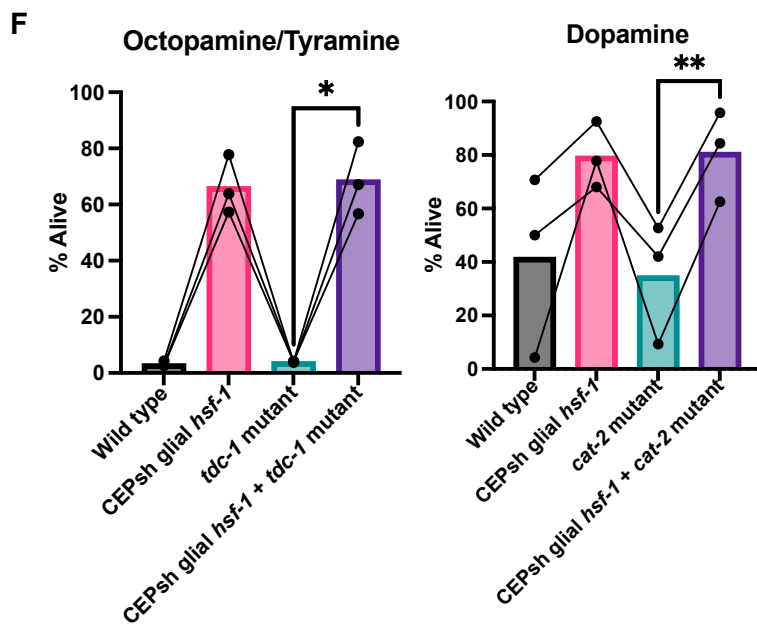

A

Empty Vector

RNAi against GFP

*hjh-17p::GFP*

*hjh-17p::GFP*

Brightfield

Brightfield

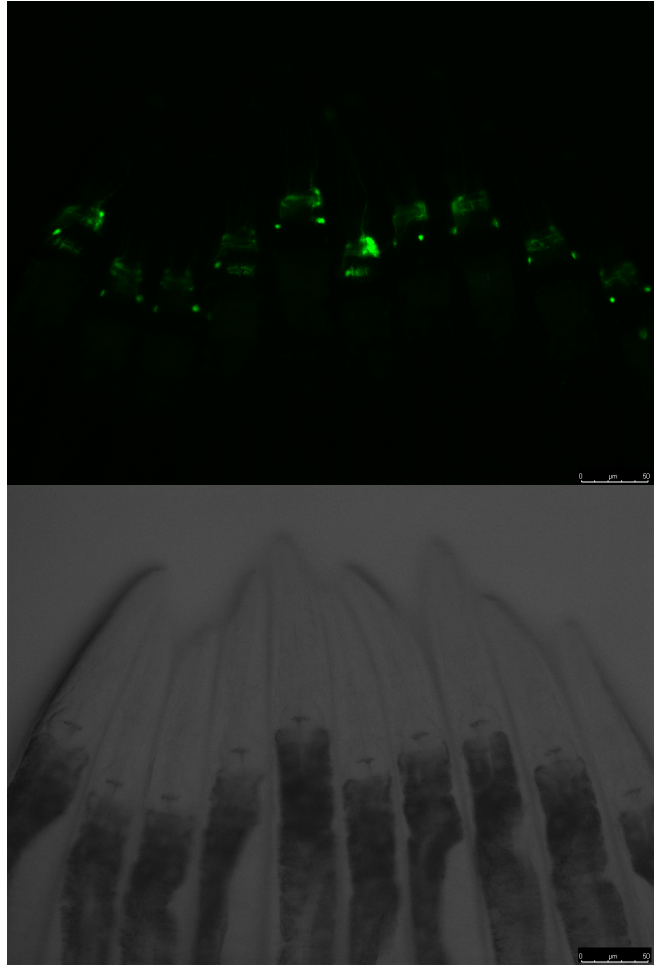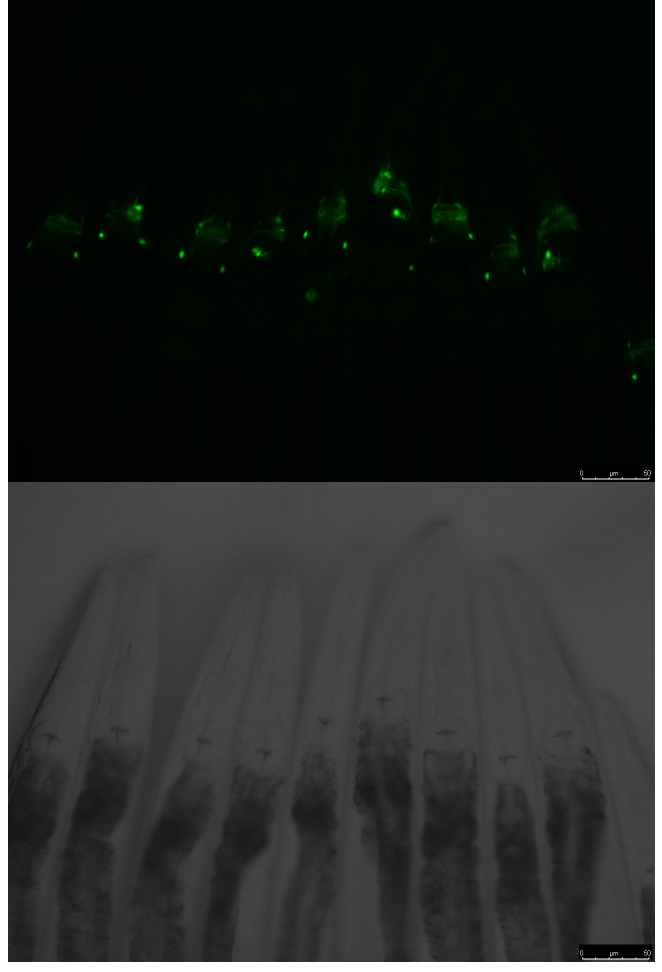

B

Thermotolerance

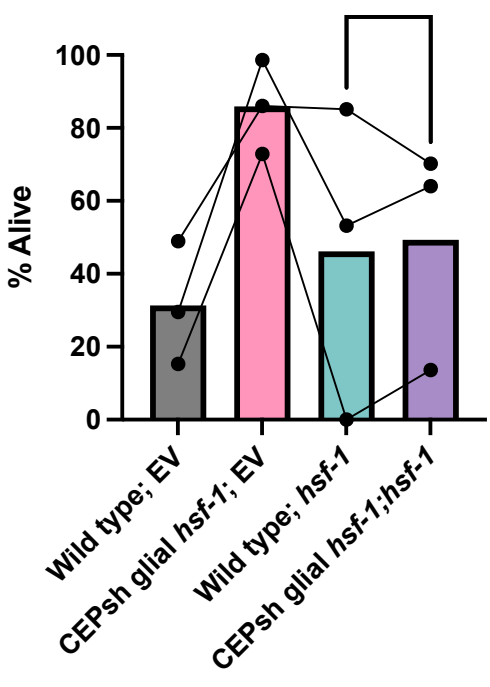

C

Thermotolerance

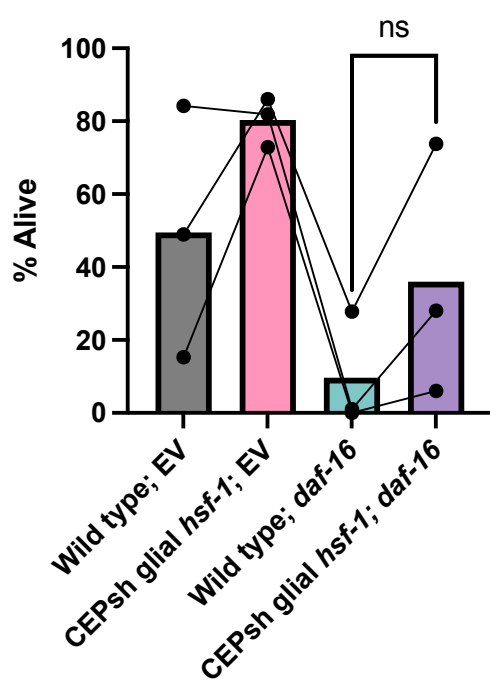

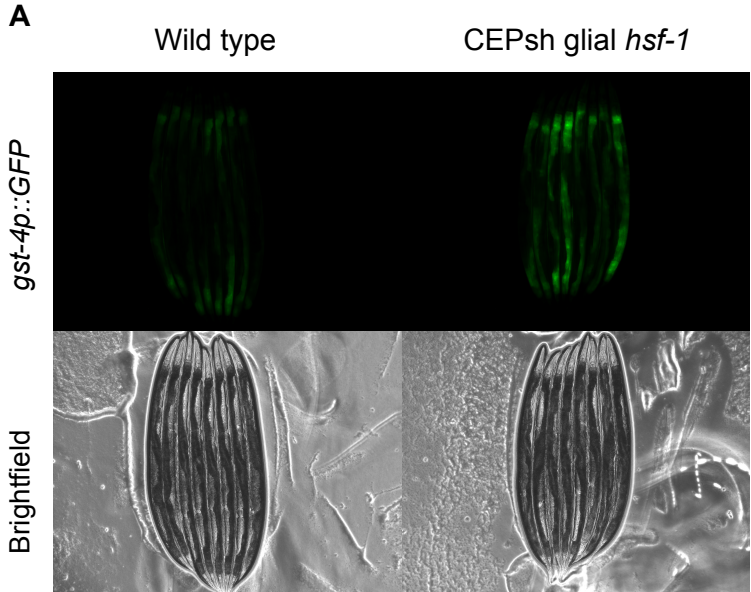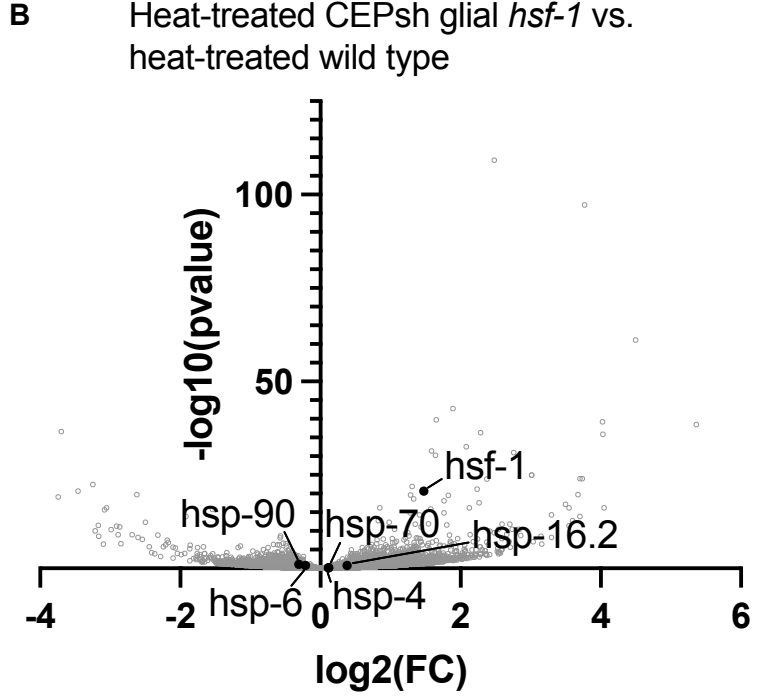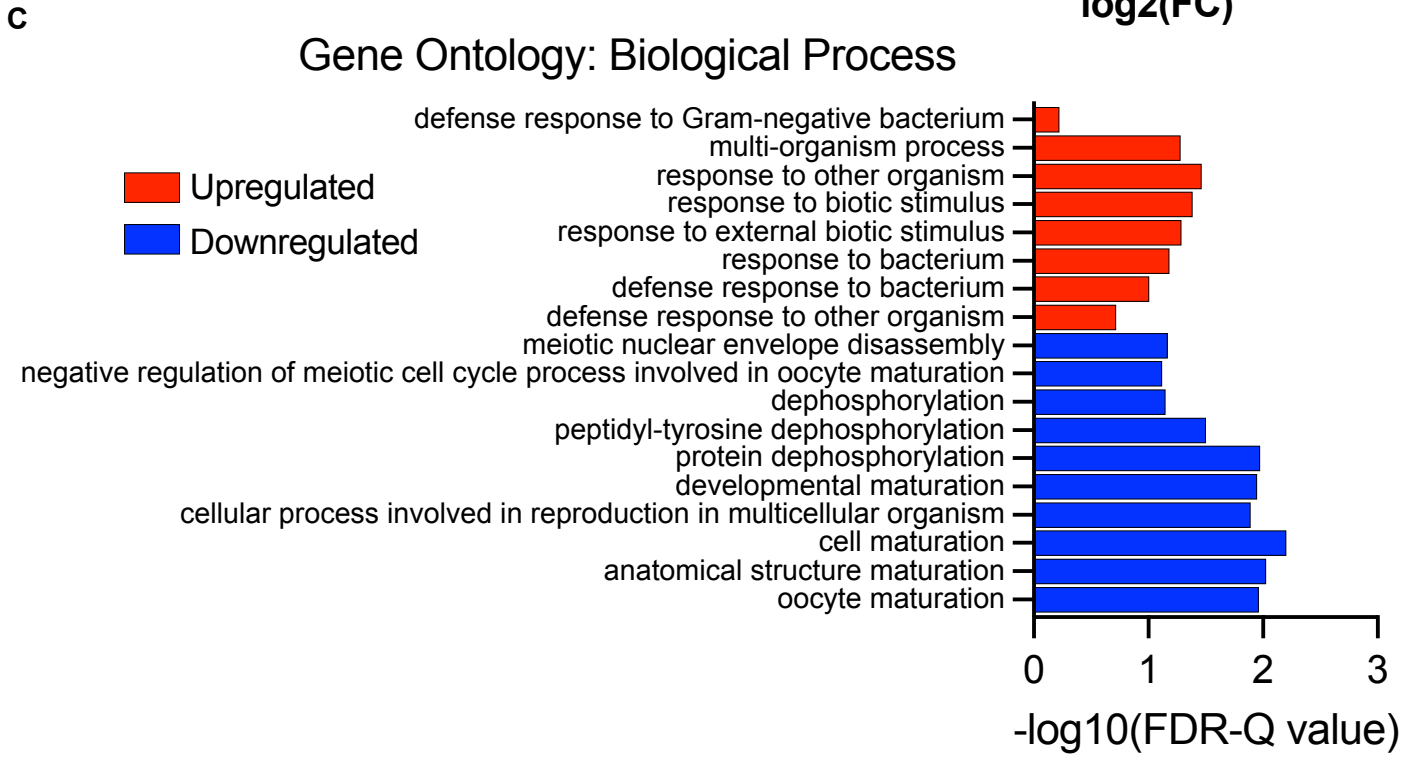

Supplementary Figure 1: Phenotype of CEPsh glial *hsf-1* and reproductive effects A) Lifespan of independent integrated array *Is2(hlh-17p::hsf-1)* is increased relative to wild type N2 animals. Median of N2 = 21 days, median of *Is2(hlh-17p::hsf-1)* = 25 days,  $p < 0.001$ . B) Lifespan of extrachromosomal array *Ex(hlh-17p::hsf-1)* is increased relative to wild type N2 animals. Median of N2 = 17 days, median of *Ex(hlh-17p::hsf-1)* = 20 days,  $p < 0.0001$ . C) Total brood size over the reproductive lifespan; *Ex(hlh-17p::hsf-1)* have significantly fewer progeny than wild type N2,  $p < 0.001$ . Error bars are SD D) Brood size depicted across days of the reproductive lifespan. Error bars are SD E) Thermotolerance of independent integrated array *Is2(hlh-17p::hsf-1)* is increased relative to wild type N2 animals,  $p = 0.03$ . F) *hsp-16.2p::GFP* transcriptional reporter worms *Is2(hlh-17p::hsf-1)* versus wild type N2 after mild heat stress and recovery (left) and qRT-PCR of the same strains for *hsp-16.2* without heat stress without heat by standard curve analysis (right). G) *sod-3p::GFP* transcriptional reporter worms *Is2(hlh-17p::hsf-1)* versus wild type N2 under basal temperature conditions (left) and *hsp-70p::GFP* transcriptional reporter versus wild type N2 under heat stress (right), lined up head to tail. H) *hsp-4p::GFP* transcriptional reporter worms *Is2(hlh-17p::hsf-1)* versus wild type N2 (left), and *hsp-6p::GFP* transcriptional reporter worms *Is2(hlh-17p::hsf-1)* versus wild type N2 (right) under basal temperature conditions. Note that bleed-through from *myo-2p::tdtomato* in CEPsh glial *hsf-1* is visible at high exposure.

Supplementary Figure 2: Glial and neuronal health are maintained, and other glial subtype promoters are insufficient to activate a peripheral HSR A) *hlh-17p::GFP* fluorescent promoter imaging in wild type versus *Ex(hlh-17p::hsf-1)* animals demonstrates the morphology of CEPsh glia. CEPsh glial *hsf-1* animals maintain neuropil wrapping and gross process extension, but sometimes display loss of symmetry. B) DiO-based dye filling of neurons in wild type versus *Ex(hlh-17p::hsf-1)* animals demonstrates normal presence of neurons. C) *Ex(fig-1p::hsf-1); hsp-16.2p::GFP* animals (right) do not display consistent increase in fluorescence relative to *hsp-16.2p::GFP* alone (left) D) *Ex(mir-228p::hsf-1); hsp-16.2p::GFP* animals (right) do not display consistent increase in fluorescence relative to *hsp-16.2p::GFP* alone (left) E) Survival of *mir-228p::hsf-1* (extrachromosomal array) is not significantly increased relative to array negative animals at 20°C.

Supplementary Figure 3: Neurotransmitter requirements for signaling A) Thermotolerance of *Ex(hlh-17p::hsf-1); unc-13(s69)* is not significantly increased relative to *unc-13(s69)* alone, although inter-trial variability is high. B-D) Thermotolerance and qRT-PCR of small clear vesicle-transported neurotransmitter mutants. Mutants for each neurotransmitter alone are displayed in blue, and CEPsh glial *hsf-1* with the relevant neurotransmitter mutant is displayed in purple. B) Thermotolerance of *Ex(hlh-17p::hsf-1); eat-4(ky5)* is not significantly increased relative to *eat-4(ky5)* alone, though there is a trend towards increase (left). Levels of *hsp-16.2* are mildly increased by qRT-PCR (right). C) Thermotolerance of *Ex(hlh-17p::hsf-1); unc-17(e245)* is not significantly increased relative to *unc-17(e245)* alone, though there is a trend towards increase (left). Levels of *hsp-16.2* are increased by qRT-PCR (right). D) Thermotolerance of *Ex(hlh-17p::hsf-1); unc-25(e156)* is significantly increased relative to *unc-25(e156)* alone,  $p = 0.02$  (left). Levels of *hsp-16.2* are increased by qRT-PCR (right). E) qRT-PCR of *Ex(hlh-17p::hsf-1)* animals alone, displaying wild type N2 conditions to which displayed trials are normalized. F) Thermotolerance of presumed dense core vesicle-transported neurotransmitter mutants. Mutants for each neurotransmitter alone are displayed in blue, and CEPsh glial *hsf-1*



with the relevant neurotransmitter mutant is displayed in purple. Thermotolerance of *Ex(hlh-17p::hsf-1); cat-2(n4547)* is significantly increased relative to *cat-2(n4547)* alone,  $p=0.03$  (right). Thermotolerance of *Ex(hlh-17p::hsf-1); tdc-1(n3419)* is significantly increased relative to *tdc-1(n3419)* alone,  $p=0.04$  (left).

Supplementary Figure 4: Effects of RNAis on CEPsh glia A) CEPsh glial GFP via *hlh-17p::GFP* is not knocked down when exposed to RNAi against GFP (right), as compared to signal on empty vector bacteria (left) B) Thermotolerance of *Ex(hlh-17p::hsf-1)* eating *hsf-1* RNAi bacteria (blue) is not significantly increased relative to that of wild type N2 worms eating *hsf-1* RNAi (purple). C) Thermotolerance of *Ex(hlh-17p::hsf-1)* eating *daf-16* RNAi bacteria (blue) is not significantly increased relative to that of wild type N2 worms eating *daf-16* RNAi (purple).

Supplementary Figure 5: Validation of RNA sequencing and heat-shocked RNA sequencing A) CEPsh glial *hsf-1* animals display increased *gst-4p::GFP* relative to wild type animals. B) Volcano plot demonstrating magnitude ( $\text{Log}_2(\text{FC})$ ) and significance ( $-\log_{10}(\text{p-value})$ ) of changes in gene expression from whole-animal RNA sequencing of *Is1(hlh-17p::hsf-1)* versus wild type N2 after a 30 minute, 34°C heat shock. Labeled genes are stress genes, including *hsf-1* and HSR chaperones *hsp-70*, *hsp-16.2* (HSF-1 regulated) and *hsp-90* (non-HSF-1 regulated), as well as ER UPR chaperone *hsp-4* and mitochondrial UPR chaperone *hsp-6*. C) The top Gene Ontology (GO) terms for up- (red) and down- (blue) regulated genes in *Is1(hlh-17p::hsf-1)* versus wild type N2 after a 30 minute, 34°C heat shock are displayed with their  $-\log_{10}$  corrected FDR-Q value.
